# Supplementary material for: The Reverberation of Corona Pandemic in Developing Countries Special Reference To Ethiopia
Source: Research Square preprint supplement (doi:10.21203/rs.3.rs-595323/v1), 2021-06-30
Supplement: Supplementary file 1 [file b5e4c1013a67fcfc6c73f825.docx]

**Questioners regarding to the effects of COVID 19 in Ethiopian cities**

Dear Sir/Madam, This research is conducting to know a nationwide rapid effects of COVID 19 on social, economic and responses to COVID-19 diseases among scholars who are supposed to take leading role in combating the spread- academic staffs, health professionals and other civil servants. The study would generate useful information and insight on scholars and community’s perceived awareness and extent of self-care practices and responses to communication messages. The finding will help to reshape and make further adaptations of ongoing efforts to prevent the spread of COVID-19 virus. Therefore, we kindly request your honest and kind response to this survey questionnaire. Indeed, your participation is voluntarily. But we highly value participation and contribution at this critical time. It may take 20-30 minutes to fill the question. Your responses will be completely anonymous. If you have any questions regarding this research, contact, Abebe Temesgen email: teabeman@gmail.com, Elsabet Getachew email: elesabet27@gmail.com)

We would like to thank you for kindly consenting to participate in this survey. Please click the link to access the questionnaire Part I: Background characteristics

1. What is your age in completed years? ________________

2. What is your sex? A. Male ☐ B. Female ☐ 3. What are your current educational qualifications?

1) ☐ Primary (grade 1-8)

2) ☐ High school (grade 9-12)

3) ☐ Diploma or Level I-IV

4) ☐ First Degree (BSc/BA)

5) ☐ Medical Doctor-GP

6) ☐ Residents (specify year of residency) _____________

7) ☐ Master degree

8) ☐ Ph.D

9) ☐ Clinical Specialty /sub-specialty

10) ☐ Other (specify)___________________________________

4. What is your current marital status?

1) ☐ Single (unmarried)

2) ☐ Married

3) ☐ Divorced

4) ☐ Widowed

5) ☐ Engaged (in relationship)

5. What is your main occupation?

1) ☐ Merchant/shop

2) ☐ Teacher-elementary /high school

3) ☐ University-Academic

4) ☐ University-administrative staff

5) ☐ Health worker in government facilities (specify professional category)_______________

6) ☐ Health worker in private facilities (specify professional category)__________________

7) ☐ Health worker in administration/office (specify professional category)_______________

8) ☐ Private work/business

9) ☐ Police/security

10) ☐ Government employ (Ethiotelcom, airlines, bank/insurance/transportations)

11) ☐ work in NGOs

12) ☐ Military

13) ☐ House wife

14) ☐ Daily labouer

15) ☐ Farmer

16) ☐ Student

17) ☐ No job

18) ☐ Private firm/company

19) ☐ Other (specify)_________________________

6. Where is your place of residence?

1) ☐ Urban 2) ☐ Rural

**7. In which region of Ethiopia, are you currently living?**

1) ☐ Addis Ababa

2) ☐ Oromia

3) ☐ Tigray

4) ☐ Ahmara

5) ☐ Somali

6) ☐ Affar

7) ☐ Benishangul Gumuz

8) ☐ Gambella

9) ☐ Harari

10) ☐ Dire Dawa

11) ☐ Southern nation nationalities and peoples

8. What is your religion affiliation?

1) ☐ Orthodox

2) ☐ Muslim

3) ☐ Protestant

4) ☐ Wakeffeta

5) ☐ Other (please specify)___________________

9. Which internet connection do you mostly use to get information about COVID-19?

1) ☐ Broadband-cable

2) ☐ Cellular-data(telle)

3) ☐ DSL (home private)

4) ☐ Wireless-Wifi

5) ☐ Do not use internet Part II: Exposure to information

10. Have you heard COVID-19 disease? 1. Yes ☐ 2. No ☐

11. What is your main source of information about COVID-19 disease?

1) ☐ Internet-official websites

2) ☐ Television

3) ☐ Radio

4) ☐ Friends

5) ☐ Internet-social media (Facebook, twitter, YouTube etc)

6) ☐ Health workers

7) ☐ Neighbors

12. Which source of information about COVID-19 do you most trust? (select two sources you most trust) 1) ☐ Government Medias (TV/Radio/newsletter etc)

2) ☐ Private Medias (TV/Radio/newsletter etc)

3) ☐ Religious leaders

4) ☐ Local source (announcement, posters, banners/brochures)

5) ☐ National source ( ministry of health, Ethiopian public health institute)

6) ☐ International media

7) ☐ Social Medias (Facebook/whatsApp/Telegram/ etc)

8) ☐ Health Activists (Public figures/etc)

9) ☐ Health facilities/professionals

10) ☐ Other (please specify________________________

13. What are the main clinical symptoms of COVID-19? (Multiple response is possible)

1) ☐ Fever

2) ☐ Fatigue

3) ☐ Dry cough

4) ☐ Muscle pain

5) ☐ Sore throat

6) ☐ Diarrhea

7) ☐ Difficulty breathing

8) ☐ Body weakness

9) ☐ Other (specify)___________________________________
